# Supplementary material for: Environmental regulations, green development of agriculture, and residents’ health—empirical analysis of Yangtze River Economic Belt in China
Source: PeerJ. 2023 Jul 26;11:e15717. doi: 10.7717/peerj.15717 (PMC10386822; doi:10.7717/peerj.15717)
Supplement: Data S1 [file peerj-11-15717-s001.xlsx]

## Sheet: DATA
ID	Year	Chemical fertilizer consumption	Pesticide consumption	Agricultural plastic film consumption	Number of patients with food-borne diseases	Environmental pollution control cost	Number of laws and regulations related to agricultural and rural environment(100mn RMB)	Government's financial subsidy to agriculture(100mn RMB)	government's financial subsidy to agriculture(100mn RMB)	Per capita disposable income of urban residents(10,000 RMB)	Per capita disposable income of rural residents(10,000 RMB)
Shanghai	2011	12	0.6295	2.0489	126	6.3602	0	218.5	161.54	3.62305	1.5644
Shanghai	2012	10.99	0.5817	1.93	175	11.5915	1	245.428	217.967	4.01883	1.7636
Shanghai	2013	10.78	0.5019	1.9436	183	5.20766	6	257.66	187.246	4.48783	1.92083
Shanghai	2014	10.15	0.4666	1.9287	96	17.7859	2	262.29	202.34	4.88414	2.11916
Shanghai	2015	9.92	0.4415	1.803	61	21.1762	12	271.85	267.37	5.29619	2.32052
Shanghai	2016	9.13	0.3913	1.7062	196	51.9488	3	341.71	327.41	5.76917	2.55204
Shanghai	2017	8.9	0.3523	1.5664	80	44.824	2	389.897	456.533	6.25957	2.7825
Shanghai	2018	8.37	0.32	1.4781	234	8.0827	7	426.365	469.876	6.80336	3.03747
Shanghai	2019	8.4	0.3177	1.3213	265	29.9377	3	389.543	523.104	7.36153	3.31952
Shanghai	2020	7.5	0.2771	1.29	116	9.0711	3	406.2	473.8	7.64373	3.49113
Jiangsu	2011	337.2	8.65	10.644	568	31.0062	4	213.4	618.13	2.63407	1.0744
Jiangsu	2012	330.95	8.3675	11.255	519	39.0144	8	257.238	754.089	2.9677	1.2133
Jiangsu	2013	326.83	8.1157	11.6846	895	59.3776	5	302.591	868.338	3.15855	1.35213
Jiangsu	2014	323.61	7.9531	11.9846	842	48.5096	5	327.1	899.31	3.43463	1.49584
Jiangsu	2015	319.99	7.81	11.3243	1141	62.1741	4	371.96	1008.6	3.71735	1.62567
Jiangsu	2016	312.52	7.6184	11.3941	2657	74.7786	14	381.02	985.62	4.01516	1.76056
Jiangsu	2017	303.85	7.3167	11.5085	1791	44.7999	10	428.009	918.218	4.36218	1.9158
Jiangsu	2018	292.45	6.96	11.6064	2790	81.1733	12	507.306	996.674	4.72	2.08451
Jiangsu	2019	292.5	6.96	11.4153	1908	59.9923	10	572.038	1032.37	5.10561	2.26754
Jiangsu	2020	286.2	6.7396	11.18	1919	53.1335	4	584.39	1091.25	5.31017	2.41985
Zhejiang	2011	92.1	6.3854	5.8416	594	17.8373	23	143.9	373.32	3.09707	1.3071
Zhejiang	2012	92.15	6.2874	6.2287	410	28.3023	8	165.979	408.204	3.45503	1.4552
Zhejiang	2013	92.43	6.2198	6.4663	855	57.6645	11	191.866	513.028	3.70797	1.74939
Zhejiang	2014	89.62	5.8748	6.5677	833	67.5944	12	207.99	524.59	4.03927	1.93733
Zhejiang	2015	87.52	5.6458	6.7458	1009	58.6017	11	250.79	739.08	4.37145	2.1125
Zhejiang	2016	84.48	4.9482	6.73	1463	60.1869	18	269.04	722.41	4.72372	2.28661
Zhejiang	2017	82.63	4.6303	6.7891	979	36.9011	12	303.496	696.693	5.12607	2.49558
Zhejiang	2018	77.76	4.37	6.8731	1417	35.308	19	379.657	724.462	5.55743	2.73024
Zhejiang	2019	77.8	4.3725	6.6737	1726	34.065	13	516.061	744.242	6.01823	2.98758
Zhejiang	2020	72.5	3.8572	6.7	1693	50.5097	11	472.13	764.89	6.26993	3.19305
Anhui	2011	329.7	11.7475	8.6114	906	9.2793	4	77.03	351.87	1.86061	0.6811
Anhui	2012	333.53	11.6741	9.1171	535	12.735	2	95.9996	430.472	2.10242	0.7826
Anhui	2013	338.4	11.7774	9.4882	534	41.3195	4	109.67	478.172	2.27893	0.885
Anhui	2014	341.39	11.3974	9.6155	576	17.622	4	129.59	502.69	2.48385	0.991642
Anhui	2015	338.69	11.1048	9.7943	945	17.945	12	147.94	577.74	2.69358	1.08207
Anhui	2016	327.01	10.5704	9.6966	1835	41.5486	11	259.5	624.83	2.9156	1.17205
Anhui	2017	318.72	9.9394	9.7601	2031	25.8955	33	260.413	681.909	3.16403	1.27582
Anhui	2018	311.8	9.42	9.7828	1194	19.9045	36	294.815	704.856	3.43931	1.3996
Anhui	2019	311.8	9.4177	10.3735	1047	27.0492	17	377.95	736.273	3.754	1.5416
Anhui	2020	298	8.8271	10.33	1050	24.3546	6	369.98	924.29	3.94421	1.66202
Jiangxi	2011	140.8	9.9537	4.771	15	6.6235	6	21.32	287.99	1.74949	0.7133
Jiangxi	2012	330.95	10.0413	5.0275	6	3.9478	6	27.4969	384.767	1.98604	0.8103
Jiangxi	2013	326.83	9.9922	5.1401	130	15.5192	2	46.322	438.535	2.21197	0.908878
Jiangxi	2014	323.61	9.4764	5.3122	299	12.3466	4	58.37	500.15	2.43092	1.01166
Jiangxi	2015	319.99	9.3873	5.3977	695	14.7833	2	74.79	557.3	2.65001	1.11391
Jiangxi	2016	312.52	9.2188	5.2757	1058	10.4485	7	83.12	580.9	2.86733	1.21377
Jiangxi	2017	303.85	8.7737	5.3509	1382	10.6395	4	120.086	607.709	3.11981	1.32418
Jiangxi	2018	292.45	7.72	5.2218	1123	20.5246	8	147.094	599.408	3.38194	1.44599
Jiangxi	2019	123.2	7.7183	5.202	951	20.1243	3	182.919	619.803	3.65459	1.57963
Jiangxi	2020	115.6	6.2701	5.23	846	9.3009	1	195.74	740.31	3.85558	1.69808
Hubei	2011	354.9	13.9524	6.5044	165	9.2873	18	44.19	376.23	1.83739	0.754
Hubei	2012	354.89	13.9524	6.5044	216	14.8964	12	54.3942	419.022	2.08396	0.8582
Hubei	2013	351.93	12.7152	6.631	103	25.1745	13	77.2088	465.342	2.26679	0.96918
Hubei	2014	348.27	12.6099	6.9186	343	26.2884	4	134.46	483.8	2.48523	1.08491
Hubei	2015	333.87	12.0685	7.1321	299	15.7976	6	157.36	616.57	2.70515	1.18439
Hubei	2016	327.96	11.7401	6.7306	660	36.9051	9	190.11	704.59	2.93858	1.2725
Hubei	2017	317.93	10.9588	6.5876	424	17.4632	8	234.271	714.733	3.18894	1.38121
Hubei	2018	295.82	10.33	6.3554	495	13.7434	2	268.488	785.554	3.44546	1.49778
Hubei	2019	295.8	10.3317	5.8801	494	13.3861	3	319.285	828.21	3.76014	1.63909
Hubei	2020	273.9	9.7024	5.8	706	19.8108	5	287.85	868.9	3.67057	1.63059
Hunan	2011	242.5	12.0431	7.3729	870	9.7039	8	41.96	394.26	1.88441	0.7082
Hunan	2012	249.11	12.298	7.9536	762	17.9561	7	48.1929	447.736	2.13188	0.8024
Hunan	2013	248.19	12.4298	8.2407	844	23.3655	1	55.46	516.554	2.4352	0.902855
Hunan	2014	247.8	12.4277	8.2946	1190	17.3424	6	59.38	557.59	2.65702	1.00602
Hunan	2015	246.54	12.2353	8.3989	1569	26.1424	2	66.26	676.24	2.88381	1.09925
Hunan	2016	246.44	11.8661	8.4679	2555	12.7037	10	71.44	729.75	3.12839	1.19304
Hunan	2017	245.26	11.6023	8.5209	2752	8.609	14	91.4239	782.422	3.39479	1.29358
Hunan	2018	242.61	11.42	8.5397	2847	7.0505	11	129.941	925.572	3.66983	1.40925
Hunan	2019	242.6	11.4155	8.3792	2211	5.4788	6	171.921	978.676	3.98419	1.53948
Hunan	2020	229	10.5548	8.3	3076	3.3508	3	220.66	987.71	4.16975	1.65846
Chongqing	2011	95.6	2.0324	3.9332	808	4.9384	4	25.04	198.91	2.02497	0.6605
Chongqing	2012	96.02	1.948	4.0928	798	3.8226	4	29.8409	256.349	2.29681	0.7526
Chongqing	2013	96.64	1.8354	4.286	311	7.88802	4	38.6529	281.941	2.30582	0.849255
Chongqing	2014	97.26	1.8437	4.3824	322	5.0284	6	38.16	291.62	2.51472	0.948982
Chongqing	2015	97.72	1.8199	4.5162	625	5.9885	6	45.67	331.33	2.72388	1.05047
Chongqing	2016	96.14	1.7604	4.5265	373	3.7141	4	51.62	347.99	2.961	1.15488
Chongqing	2017	95.46	1.7467	4.5479	2005	6.0702	5	59.3077	347.567	3.21932	1.26379
Chongqing	2018	93.17	1.72	4.4625	1769	4.9057	2	68.5887	366.775	3.48893	1.37812
Chongqing	2019	93.2	1.7191	4.2559	505	3.7461	2	79.2329	389.527	3.79386	1.51333
Chongqing	2020	91.1	1.6542	4.17	684	4.0176	2	82.87	416.76	4.00062	1.63614
Sichuan	2011	251.2	6.191	12.2227	431	16.6537	3	45.75	545.7	1.78991	0.6129
Sichuan	2012	253.03	6.0317	12.6827	344	11.0608	9	59.3977	654.948	2.0307	0.7001
Sichuan	2013	251.14	5.9954	12.7854	656	18.8392	3	69.5104	741.784	2.22275	0.838069
Sichuan	2014	250.19	5.9385	13.0263	709	23.2452	6	81.76	826.59	2.42344	0.934774
Sichuan	2015	249.83	5.8912	13.217	900	11.8259	4	96.69	926.65	2.62053	1.02474
Sichuan	2016	248.98	5.8038	13.2384	1689	11.6049	4	101.09	988.71	2.83353	1.12031
Sichuan	2017	241.95	5.5751	13.0993	621	12.6934	3	106.575	1023.13	3.07269	1.22269
Sichuan	2018	235.21	5.13	12.0186	618	16.3097	2	147.906	1310.89	3.32159	1.33314
Sichuan	2019	235.2	5.1276	12.3235	1756	12.326	3	184.945	1288.42	3.61537	1.46701
Sichuan	2020	222.8	4.629	11.88	1760	24.4414	3	181.7	1339.36	3.82531	1.59291
Yunnan	2011	200.5	4.8157	9.1229	2307	13.7331	3	28.3	409.8	1.85756	0.517
Yunnan	2012	210.21	5.5326	10.128	3499	19.7259	0	32.6671	518.605	2.10745	0.593
Yunnan	2013	219.02	5.4782	10.6606	2473	23.893	2	42.5904	538.975	2.246	0.672364
Yunnan	2014	226.86	5.7225	11.0993	2900	24.4003	9	43.15	594.45	2.4299	0.745613
Yunnan	2015	231.87	5.8648	11.3104	3899	21.5878	10	48.56	641.52	2.63732	0.824208
Yunnan	2016	235.58	5.8601	11.5926	5171	12.7174	2	46.86	712.92	2.86106	0.901981
Yunnan	2017	231.94	5.7675	12.015	4215	5.9617	2	53.4171	674.816	3.09959	0.986217
Yunnan	2018	217.37	5.26	11.9685	4887	9.8665	4	54.9441	842.2	3.34879	1.07679
Yunnan	2019	217.4	5.2591	12.2139	5866	11.9331	6	59.0031	1117.2	3.62377	1.19024
Yunnan	2020	204	4.7441	12.16	6621	14.2339	6	64.94	1100.13	3.74995	1.28419
Guizhou	2011	94.1	1.4469	4.0857	949	13.197	5	21.68	278.47	1.6495	0.4499
Guizhou	2012	98.17	1.445	4.4062	693	12.4663	3	28.9831	361.873	1.87005	0.5159
Guizhou	2013	97.42	1.348	4.7495	589	19.5562	1	34.2698	400.31	2.05649	0.589777
Guizhou	2014	101.29	1.3425	4.8949	641	18.4765	11	44.34	447.19	2.25482	0.667122
Guizhou	2015	103.69	1.3722	4.9403	492	10.7033	11	58.68	534.26	2.45796	0.738687
Guizhou	2016	103.67	1.3677	5.1053	685	5.6904	13	69.3	629.38	2.67426	0.809028
Guizhou	2017	95.65	1.3399	5.1138	1580	5.336	31	87.7209	612.049	2.90798	0.88691
Guizhou	2018	89.48	1.11	5.5031	2076	6.6125	18	102.877	664.844	3.15919	0.971611
Guizhou	2019	89.5	1.1122	4.4121	1625	8.9572	4	114.132	998.901	3.44042	1.07563
Guizhou	2020	83.2	0.921	4.54	2819	15.4911	3	113.19	1024.31	3.60962	1.16423
